# Supplementary material for: A chemical proteomics approach reveals Hsp27 as a target for proapoptotic clerodane diterpenes
Source: Royal Society of Chemistry journal article supplement (doi:10.1039/c2mb25171j), 2012-07-04
Supplement: c2mb25171j.pdf [file c2mb25171j.pdf]

### Supplementary information

**Limited proteolysis data:** Digestion fragments produced in the limited proteolysis experiments performed on Hsp27 or on the complexes HAA/Hsp27 or **16**/Hsp27 were analyzed by MALDI/MS instrument operating in reflectron or in liner mode, depending on the  $m/z$  range. Achieved results are summarized in the tables S1-S3. An example of the MALDI spectra acquired in these analyses is reported (figure S1).

**Table S1:** Digestion fragments observed by MALDI/MS in the limited proteolysis experiments performed on Hsp27 or on the complexes HAA/Hsp27 or **16**/Hsp27 using trypsin.

| Molecular mass           | Peptide | Hydrolysis site(s) |
|--------------------------|---------|--------------------|
| 1372.8                   | 1-11    | R11                |
| <b>21296<sup>a</sup></b> | 12-204  | R11                |
| 1901.9 <sup>b</sup>      | 12-26   | R11; R26           |
| 3046.5 <sup>b</sup>      | 12-36   | R11; R36           |
| <b>5265</b>              | 12-55   | R11; R55           |
| <b>20593</b>             | 12-197  | R11; K197          |
| 3256.6 <sup>b</sup>      | 1-26    | R26                |
| <b>19411<sup>b</sup></b> | 27-204  | R26                |
| 1162.6 <sup>b</sup>      | 27-36   | R26; R36           |
| 3377.7 <sup>b</sup>      | 27-55   | R26; R55           |
| <b>18708<sup>b</sup></b> | 27-197  | R26; K197          |
| <b>4404<sup>b</sup></b>  | 1-36    | R36                |
| <b>18265<sup>b</sup></b> | 37-204  | R36                |
| 2233.1 <sup>b</sup>      | 37-55   | R36; R55           |
| <b>17563<sup>b</sup></b> | 37-197  | R36; K197          |
| <b>6620</b>              | 1-55    | R55                |
| <b>16049</b>             | 56-204  | R55                |
| <b>15346</b>             | 56-197  | R55; K197          |
| <b>21949</b>             | 1-197   | K197               |

<sup>a</sup> Masses reported in bold were observed by MALDI/MS instrument operating in linear mode

<sup>b</sup> These species were not detected in the digestion performed on the HAA/Hsp27 complex.

**Table S2:** Digestion fragments observed by MALDI/MS in the limited proteolysis experiments performed on Hsp27 or on the complexes HAA/Hsp27 or 16/Hsp27 using chymotrypsin.

| Molecular mass           | Peptide | Hydrolysis site(s) |
|--------------------------|---------|--------------------|
| 3369.7 <sup>b</sup>      | 1-27    | L27                |
| <b>19297<sup>b</sup></b> | 28-204  | L27                |
| <b>11710<sup>b</sup></b> | 28-132  | L27; Y132          |
| 3978.0 <sup>b</sup>      | 1-32    | F32                |
| <b>18689<sup>b</sup></b> | 33-204  | F32                |
| <b>4404<sup>b</sup></b>  | 33-132  | F32; Y132          |
| <b>15064</b>             | 1-132   | Y132               |
| <b>7606</b>              | 133-204 | Y132               |

<sup>a</sup> Masses reported in bold were observed by MALDI/MS instrument operating in linear mode

<sup>b</sup> These species were not detected in the digestion performed on the HAA/Hsp27 complex

**Table S3:** Digestion fragments observed by MALDI/MS in the limited proteolysis experiments performed on Hsp27 or on the complexes HAA/Hsp27 or 16/Hsp27 using GluC.

| Molecular mass           | Peptide | Hydrolysis site(s) |
|--------------------------|---------|--------------------|
| 1915.0                   | 1-16    | D16                |
| <b>20238<sup>a</sup></b> | 17-204  | D16                |
| <b>19780</b>             | 17-194  | D16; E194          |
| <b>21278</b>             | 1-194   | E194               |

<sup>a</sup> Masses reported in bold were observed by MALDI/MS instrument operating in linear mode

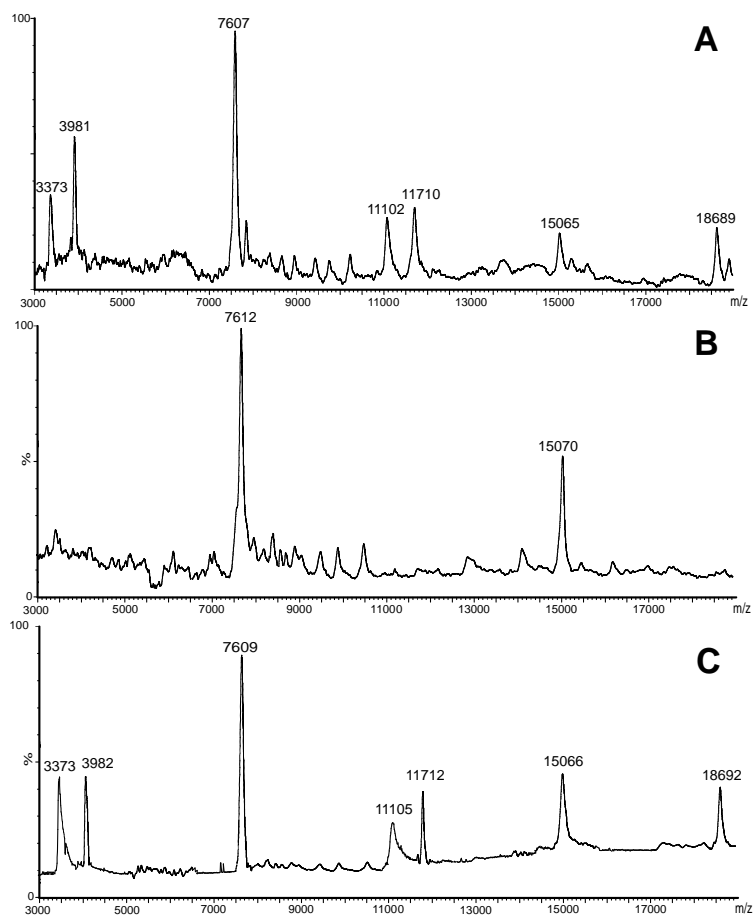

**Figure S1:** MALDI/MS spectra of the digestion fragments produced in the limited proteolysis experiments performed on Hsp27 (A), on the HAA/Hsp27 complex (B) or on the 16/Hsp27 complex using chymotrypsin as a proteolytic agent.
